# Supplementary material for: Effect of swelling and deswelling on the elasticity of polymer networks in the dilute to semi-dilute region
Source: Royal Society of Chemistry journal article supplement (doi:10.1039/c2sm07043j), 2012-01-01
Supplement: c2sm07043j.pdf [file c2sm07043j.pdf]

## Supplementary Information

### **Effect of swelling and deswelling on the elasticity of polymer networks in dilute to semi-dilute region**

Takamasa Sakai<sup>1\*</sup> and Manami Kurakazu<sup>1</sup>, Yuki Akagi<sup>1</sup>, Mitsuhiro Shibayama<sup>2</sup>, Ung-il Chung<sup>1</sup>

*1) Department of Bioengineering, School of Engineering, The University of Tokyo,  
7-3-1 Hongo, Bunkyo-ku, Tokyo 113-8656, Japan  
and*

*2) Institute for Solid State Physics, The University of Tokyo,  
5-1-5 Kashiwanoha, Kashiwa, Chiba 277-8581, Japan*

Figure S1  
T. Sakai et al.

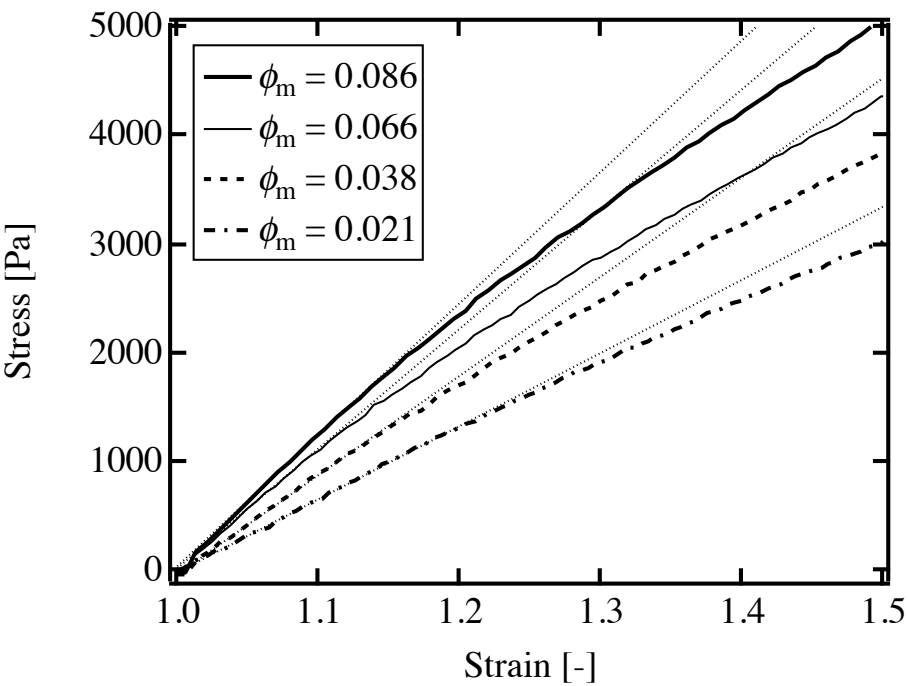

The stress-strain curve of Tetra-PEG gel 20k ( $\phi_0 = 0.034$ ), with different  $\phi_m$ 's. The thin dotted lines show the fit results.
